# Supplementary material for: G-actin guides p53 nuclear transport: potential contribution of monomeric actin in altered localization of mutant p53
Source: PubMed Central journal article supplement (PMC5013524; doi:10.1038/srep32626), 2016-09-07
Supplement: srep32626-s1.pdf [file srep32626-s1.pdf]

## G-actin guides p53 nuclear transport: potential contribution of monomeric actin in altered localization of mutant p53

Taniya Saha<sup>1</sup>, Deblina Guha<sup>1</sup>, Argha Manna<sup>1</sup>, Abir Kumar Panda<sup>1</sup>, Jyotsna Bhat<sup>2</sup>, Subhrangsu Chatterjee<sup>2</sup>, and Gaurisankar Sa<sup>1\*</sup>

<sup>1</sup>Division of Molecular Medicine, Bose Institute, P-1/12, CIT Scheme VII M, Kolkata-700054, India

<sup>2</sup>Division of Biophysics, Bose Institute, P-1/12, CIT Scheme VII M, Kolkata-700054, India

### Supplementary figures:

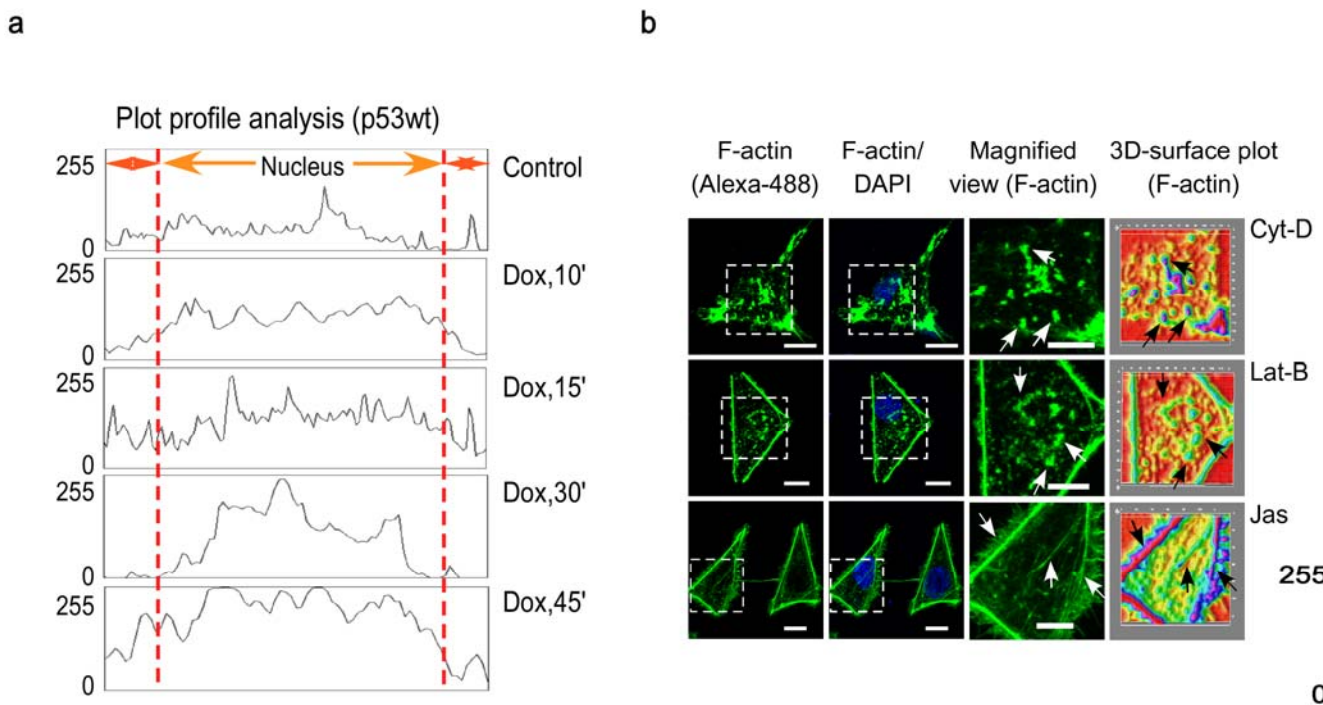

**Supplementary Figure-S1:** Nuclear distribution of p53. (a) Plot-profile analysis of p53 distribution at increasing time intervals of Dox treatment. White dashed line in the confocal images in (Fig. 1a) indicates the linear selection for plot-profile analysis. (b) Disruption of cytoskeletal actin structure in response to various actin-perturbing drugs, i.e. Cyt-D-/Lat-B-/Jas. White arrows in the magnified images indicate disrupted fibrous actin (Cyt-D and Lat-B) or stabilized actin fibers (Jas). 3D-surface plots of magnified images have been shown in the right panel (pixel intensity values 0 to 255).

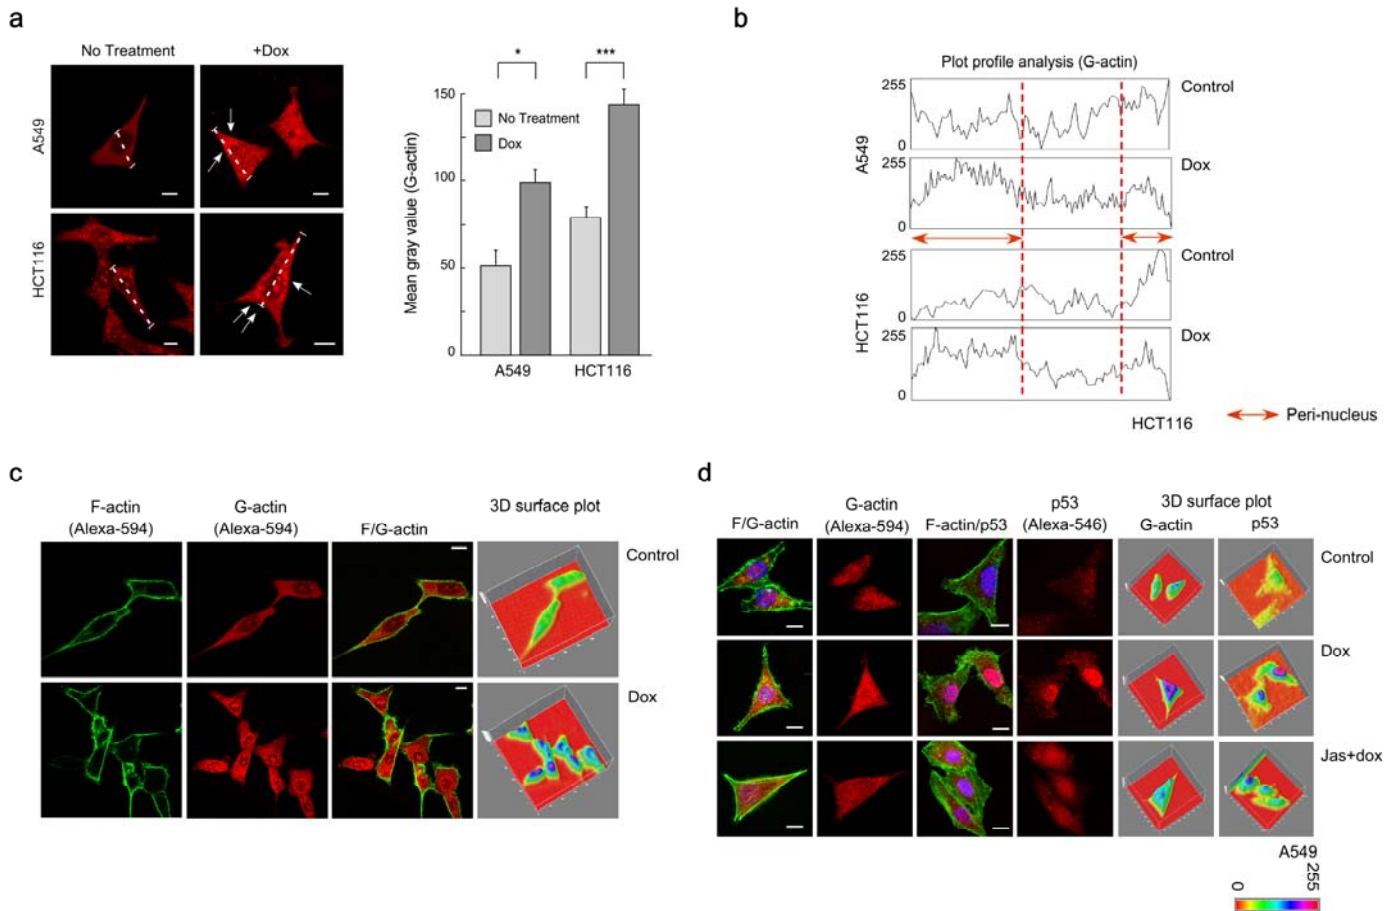

**Supplementary Figure-S2: G-actin distribution in presence of Dox.** A549 and HCT116 cells were treated with  $1\mu\text{M}$  doxorubicin for 30'. (a) Confocal images showing level of G-actin (magnification 60x; scale bar:  $10\mu\text{M}$ ). Punctate distribution of G-actin is indicated by arrowheads. Mean gray value of G-actin distribution has been represented in right. (b) Plot profiles (mean gray value *vs* distance) of G-actin distribution. White dashed lines, in Fig. 2a, indicate the linear ROI selection (pixel intensity values 0 to 255). (c) F/G-actin distribution in HCT116 cells in control and doxorubicin-treated condition. F- and G-actin were stained with Alexa-488-tagged phalloidin and Alexa-594-tagged DnaSe1 respectively. (d) F/G-actin distribution and F-actin/p53 distribution in control, Dox, and Jas+Dox condition in A549 cells.

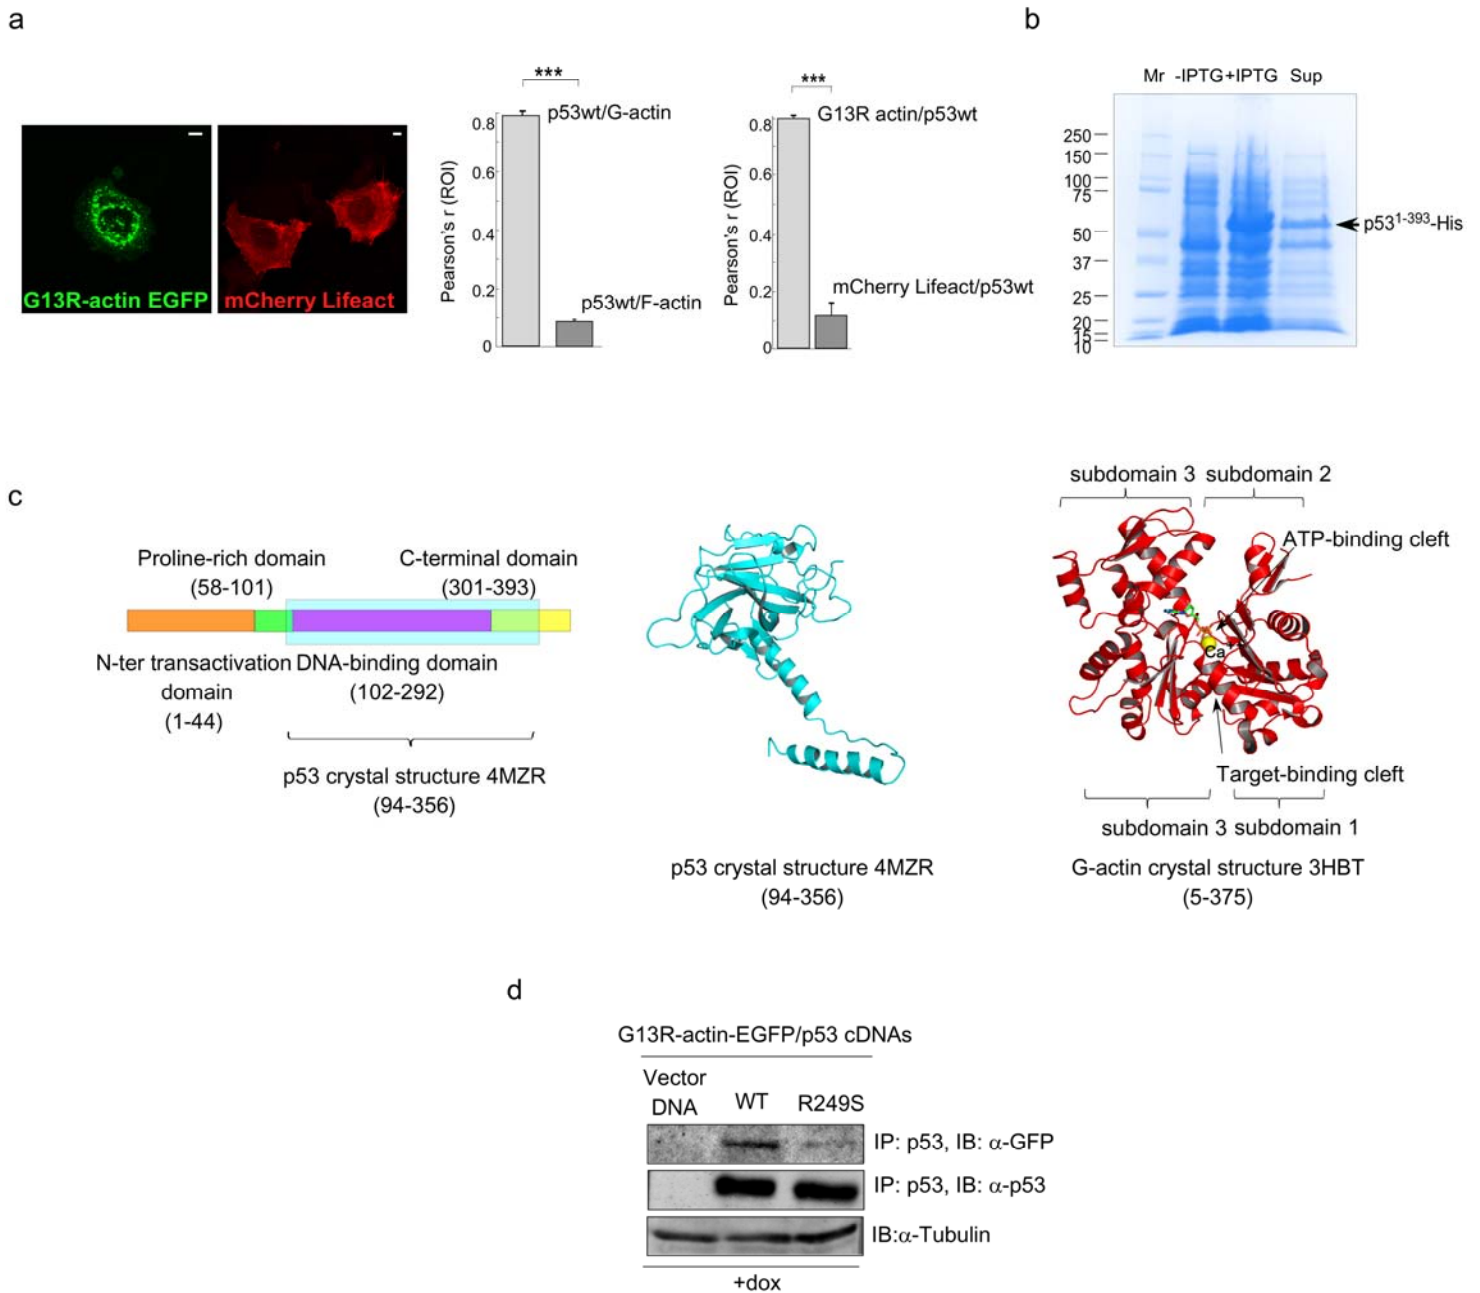

**Supplementary Figure-S3:** Domain structure of p53 and G-actin and the respective degree of colocalization correlation. **(a)** Expression of G13R-actin-EGFP and m-Cherry Lifeact, upon transient transfection of plasmids in H1299 cells (*left panel*); scale bar: 10 μM. Bar diagram of Pearson's colocalization correlation between distribution of p53:G-actin and p53:F-actin (*middle*). Bar diagram of Pearson's colocalization correlation between distribution of p53:G13R-actin and p53:Lifeact (*right*). **(b)** Bacterial expression of His-p53 in absence or presence of IPTG, and in supernatant fraction indicated with arrowhead. **(c)** The schematic of domain structure of p53. Crystal structures of p53 (*PDB code: 4MZR*) and native G-actin structure (*PDB code: 3HBT*) are shown in right. **(d)** Physical interaction between G13R-actin and p53WT/R249S in p53-null H1299 cells, were performed by co-immunoprecipitation (with anti-p53 DO-1 antibody) and Western blot (with anti-GFP antibody) assays. α-Tubulin has been used as the internal loading control.

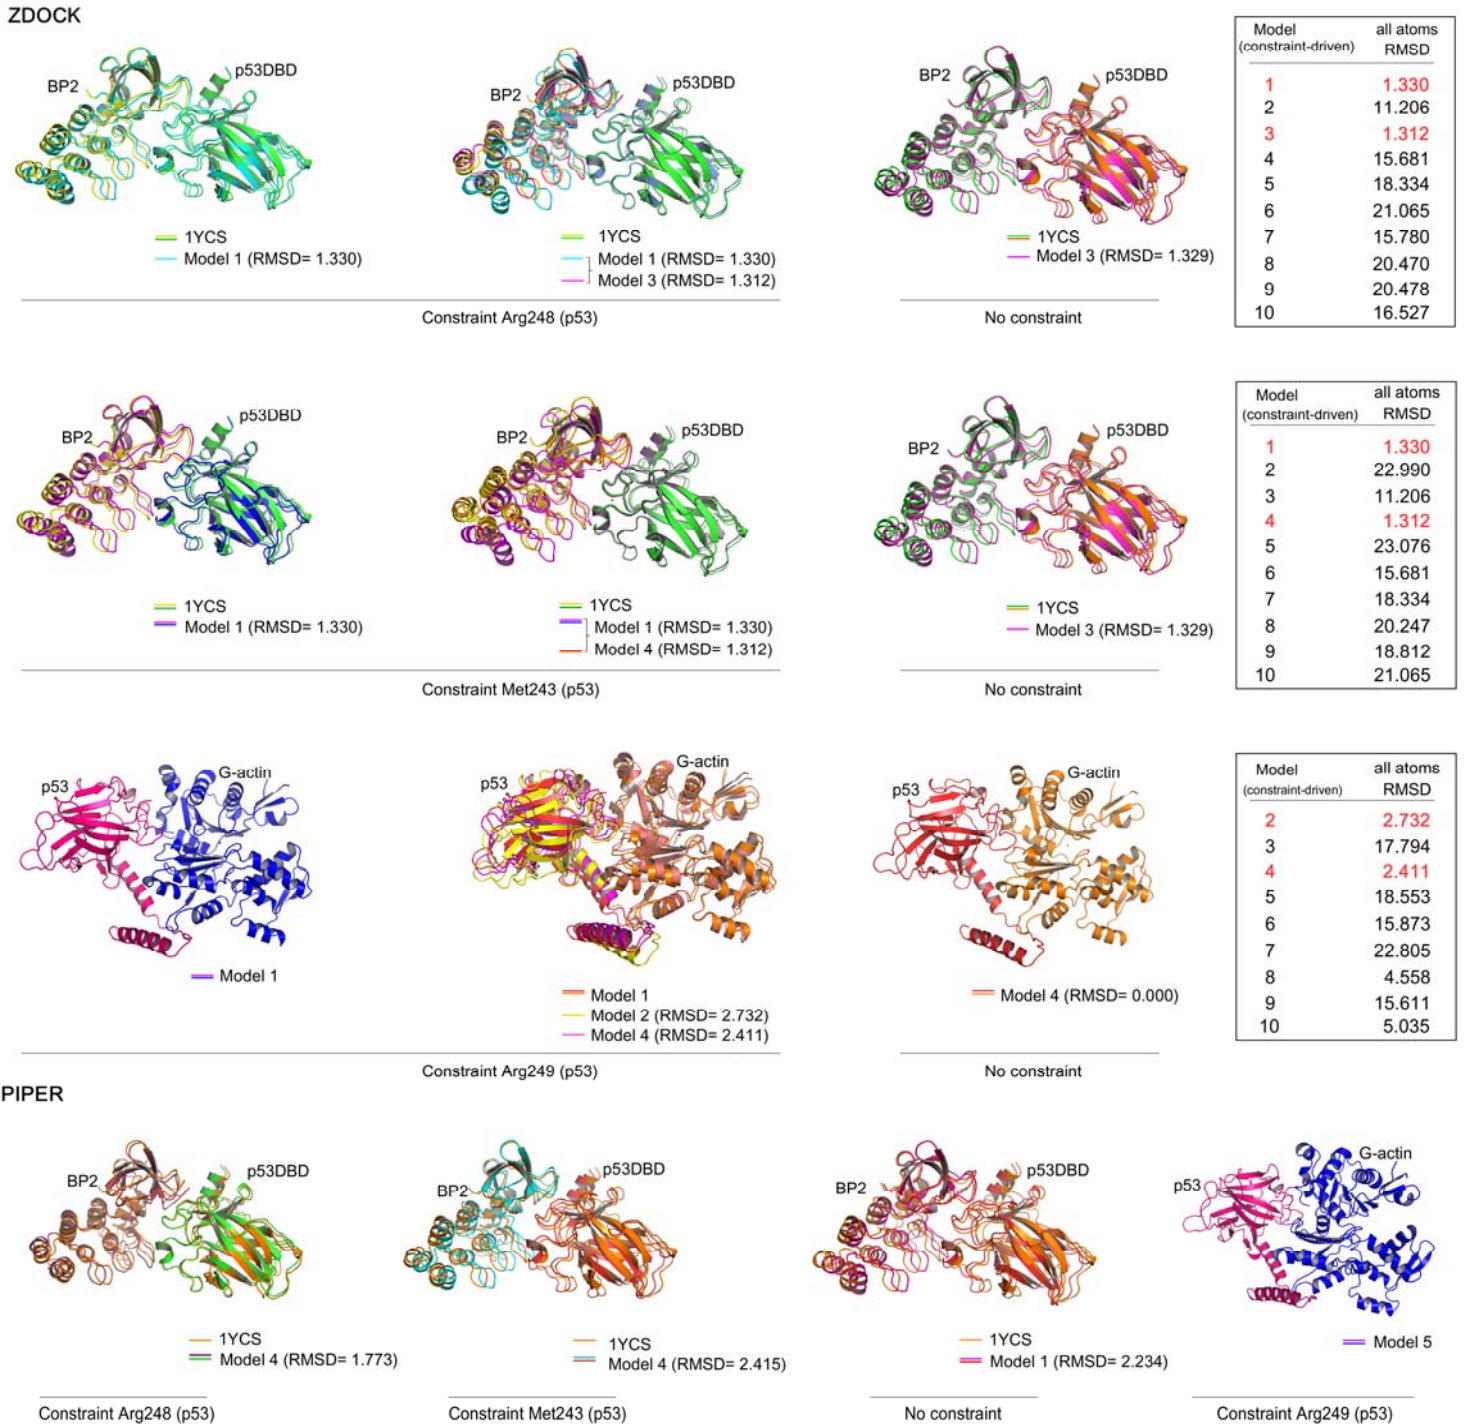

**Supplementary Figure-S4:** Docking benchmark studies in ZDOCK and PIPER using known crystal structure of p53DBD and BP2 complex (*PDB code: 1YCS*). Reproduced structures with/without docking constraint, Arg248 (*first panel*)/ Met243 (*second panel*), are shown. Reproduced p53:G-actin complex structures with/without docking constraint Arg249 (*third panel*). All atoms RMSD values with respect to 1YCS (*first and second panels*) and Model 1 (*third panel*) are tabulated for each of the docking calculation. Results derived for 1YCS and p53:G-actin complex using PIPER are shown in *fourth panel*. RMSD values of reproduced structures are highlighted in red.



Cluspro 2.0

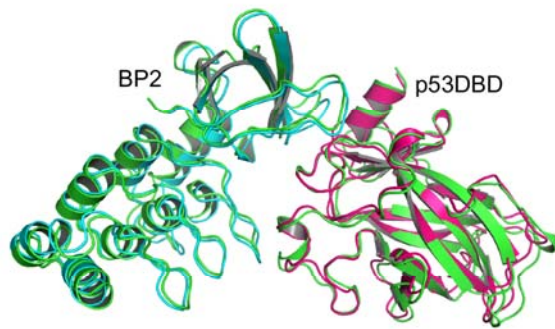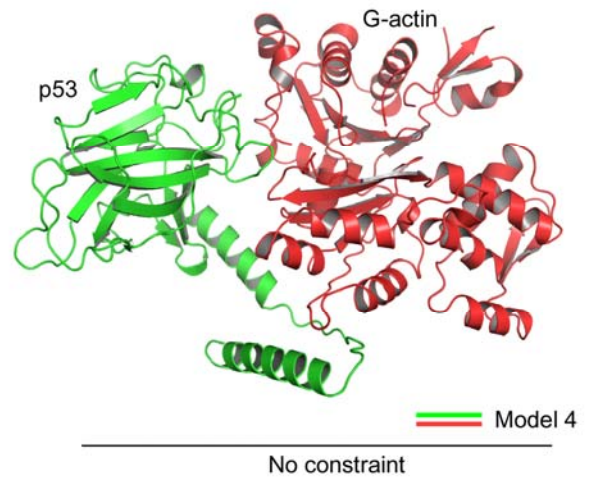

**Supplementary Figure-S5:** Docking benchmark studies in Cluspro 2.0 using known crystal structure of p53DBD and BP2 complex (*PDB code: 1YCS*). Reproduced structures for 1YCS (*left*) and p53:G-actin (*right*), without docking constraint, are represented.

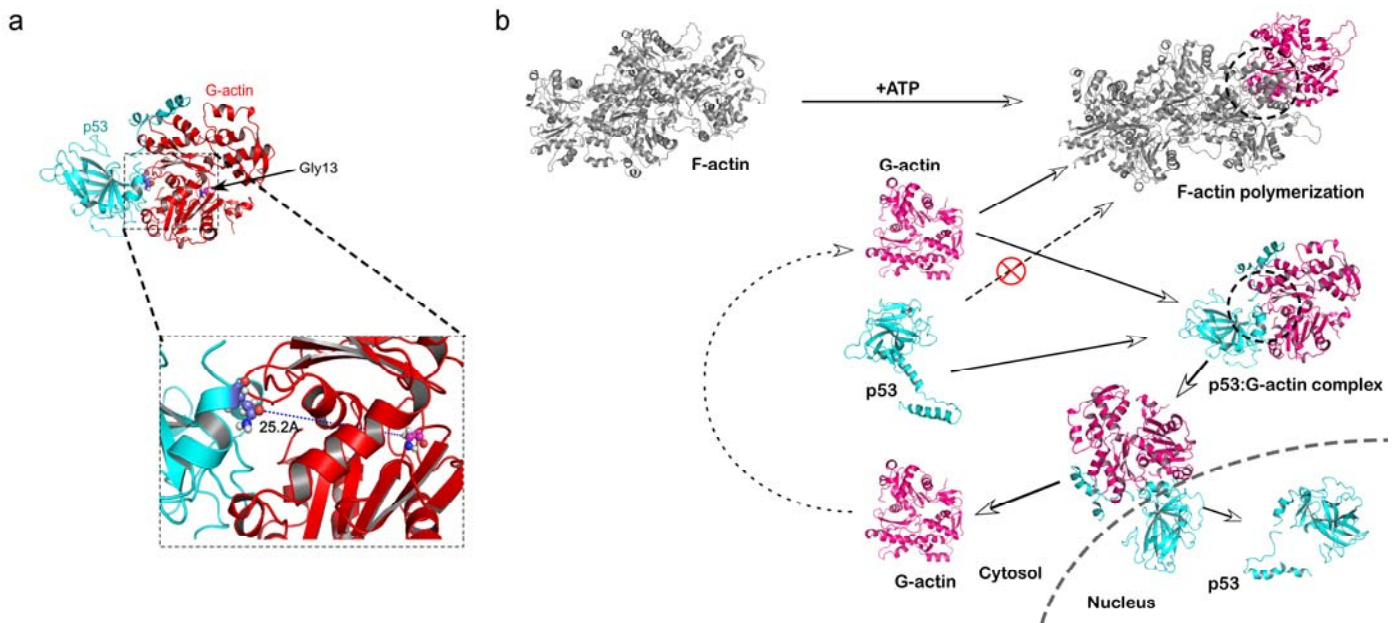

**Supplementary Figure-S6:** Schematic representation showing the basis of p53:G-actin interaction. (a) Ribbon-presentation of the post-simulation dynamic complex between wild-type p53 and G-actin, showing the position of Gly13 in G-actin. Magnified view is shown in the inset. (b) Ribbon structure depicting the formation of p53:G-actin complex in the cytosol, which is shuttled toward the nucleus, whereupon p53 dissociates from the complex and enters the nucleus. Since the site of p53:G-actin interaction overlaps with the region where monomer actin binds to the filament (marked with a black circle), F-actin retains poor affinity for p53.

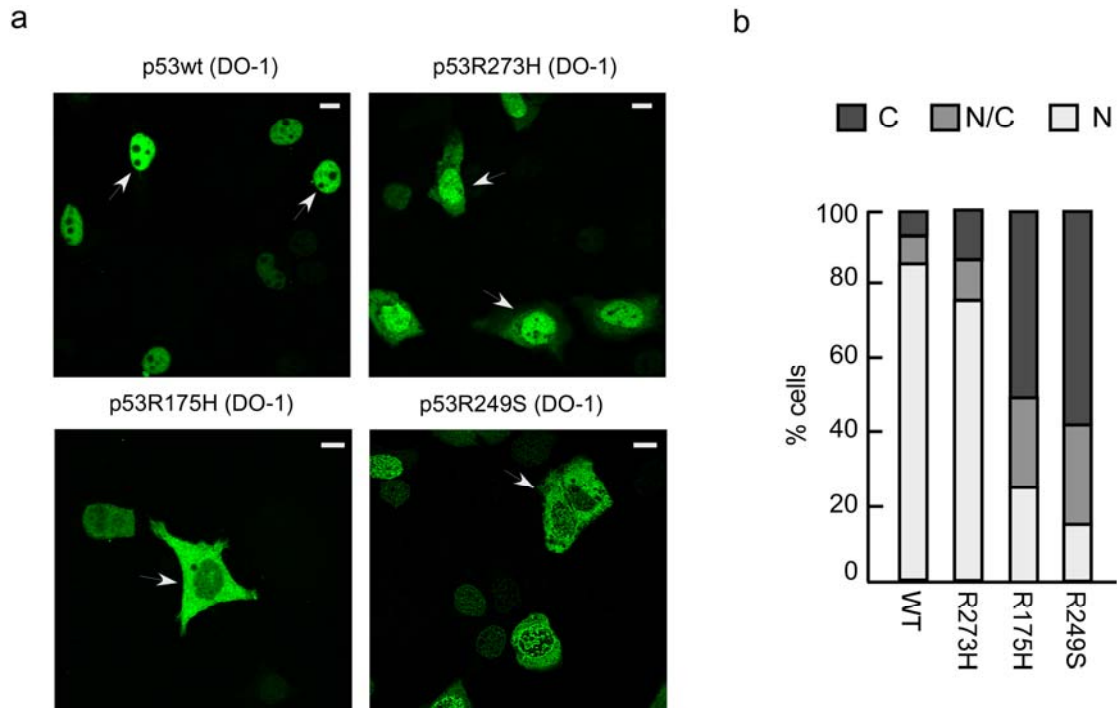

**Supplementary Figure-S7:** Subcellular localization of p53 wild-type/mutants. (a) Wild-type and mutant p53 were ectopically over-expressed in p53-null H1299 cells and stained with Alexa-488-tagged p53 (DO-1) antibody. Confocal imaging showing subcellular localization of p53; scale bar: 10 $\mu$ M. (b) Percentage cells showing nuclear, nuclear/cytoplasmic, and cytoplasmic p53 localization upon ectopically p53 over-expressed cells.

**Supplementary Table-S1:** The amino acid contacts revealed from p53:G-actin post-simulation dynamic complex are listed along with the predicted bond distance and interaction type.

| p53 residues<br>(dynamic complex) | G-actin residues<br>(dynamic complex) | Predicted bond<br>distance (Å) | Type of interaction       |
|-----------------------------------|---------------------------------------|--------------------------------|---------------------------|
| Gln165                            | Tyr151                                | 2.4                            | Polar                     |
| His168                            | Tyr154                                | 2.4                            | $\pi$ - $\pi$ interaction |
| Gln167                            | Ala155                                | 2.5                            | Polar                     |
| Gly245                            | Arg357                                | 3.3                            | Polar                     |
| Arg248                            | Glu152                                | 2.1                            | Polar                     |
| Arg249                            | Arg357                                | 1.8                            | Polar                     |
| Leu289                            | Glu152                                | 2.5                            | Polar                     |
| Leu289                            | Thr133                                | 2.8                            | Polar                     |
| His178                            | Ala350                                | 3.9                            | Polar                     |
| Leu348                            | Ile272                                | 2.9                            | Polar                     |
| Leu350                            | Ile272                                | 2.7                            | Polar                     |
| Phe328                            | Thr309                                | 2.8                            | Polar                     |

**Supplementary movie-S1:** MD simulation trajectories (50ns) of the p53WT:G-actin complex in implicit solvent.

**Supplementary movie-S2:** MD simulation trajectories (50ns) of the p53R249S:G-actin complex in implicit solvent.
